# Supplementary material for: Punch Trackers: Correct Recognition Depends on Punch Type and Training Experience
Source: MDPI journal article supplement (doi:10.3390/s21092968), 2021-04-23
Supplement: s1 [file s1]

| SUB | ACC   | CAT | REAL | REC |
|-----|-------|-----|------|-----|
| 1   | HYKSO | A   | J    | J   |
|     |       |     | C    | C   |
|     |       |     | RH   | 0   |
|     |       |     | LH   | 0   |
|     |       |     | LUC  | 0   |
|     |       |     | RUC  | RH  |
|     |       |     | J    | J   |
|     |       |     | C    | C   |
|     |       |     | C    | C   |
|     |       |     | LH   | J   |
|     |       |     | RH   | RH  |
|     |       |     | LUC  | 0   |
|     |       |     | RUC  | RH  |
|     |       |     | J    | J   |
|     |       |     | LUC  | 0   |
|     |       |     | RH   | C   |
|     |       |     | LH   | 0   |
|     |       |     | RUC  | RH  |
|     |       |     | J    | J   |
|     |       |     | C    | C   |
|     |       |     | LH   | LUC |
|     |       |     | C    | C   |
|     |       |     | J    | J   |
|     |       |     | RH   | RUC |
|     |       |     | LUC  | 0   |
|     |       |     | RH   | RH  |
|     |       |     | J    | J   |
|     |       |     | RH   | RUC |
|     |       |     | LH   | J   |
|     |       |     | RH   | C   |
|     |       |     | LH   | LH  |
|     |       |     | RUC  | RUC |
|     |       |     | LUC  | 0   |
|     |       |     | RUC  | RUC |
|     |       |     | LUC  | 0   |
|     |       |     | C    | C   |
|     |       |     | LH   | J   |
|     |       |     | C    | C   |
|     |       |     | RUC  | RUC |
|     |       |     | LUC  | LUC |

|   |        |   |     |     |
|---|--------|---|-----|-----|
|   |        |   | J   | J   |
|   |        |   | RH  | RUC |
|   |        |   | RUC | RUC |
|   |        |   | LH  | LH  |
|   |        |   | RH  | RH  |
|   |        |   | RUC | RUC |
|   |        |   | C   | C   |
|   |        |   | J   | J   |
|   |        |   | C   | C   |
|   |        |   | LUC | LUC |
|   |        |   | LH  | 0   |
|   |        |   | J   | J   |
|   |        |   | RUC | RUC |
|   |        |   | RH  | RH  |
| 1 | CORNER | A | J   | J   |
|   |        |   | C   | C   |
|   |        |   | RH  | RH  |
|   |        |   | LH  | LH  |
|   |        |   | LUC | LH  |
|   |        |   | RUC | RUC |
|   |        |   | J   | C   |
|   |        |   | C   | J   |
|   |        |   | C   | C   |
|   |        |   | LH  | J   |
|   |        |   | RH  | RH  |
|   |        |   | LUC | LH  |
|   |        |   | RUC | RUC |
|   |        |   | J   | J   |
|   |        |   | LUC | LH  |
|   |        |   | RH  | RH  |
|   |        |   | LH  | LH  |
|   |        |   | RUC | RUC |
|   |        |   | J   | J   |
|   |        |   | C   | C   |
|   |        |   | LH  | LH  |
|   |        |   | C   | C   |
|   |        |   | J   | J   |
|   |        |   | RH  | RUC |
|   |        |   | LUC | LH  |
|   |        |   | RH  | RH  |
|   |        |   | J   | J   |
|   |        |   | RH  | RH  |

|   |       |   |     |     |
|---|-------|---|-----|-----|
|   |       |   | LH  | LH  |
|   |       |   | RH  | RH  |
|   |       |   | LH  | LH  |
|   |       |   | RUC | RUC |
|   |       |   | LUC | LH  |
|   |       |   | RUC | RUC |
|   |       |   | LUC | LUC |
|   |       |   | C   | C   |
|   |       |   | LH  | LH  |
|   |       |   | C   | C   |
|   |       |   | RUC | RUC |
|   |       |   | LUC | LH  |
|   |       |   | J   | J   |
|   |       |   | RH  | RUC |
|   |       |   | RUC | RUC |
|   |       |   | LH  | LH  |
|   |       |   | RH  | RH  |
|   |       |   | RUC | RUC |
|   |       |   | C   | J   |
|   |       |   | J   | C   |
|   |       |   | C   | C   |
|   |       |   | LUC | LUC |
|   |       |   | LH  | LH  |
|   |       |   | J   | J   |
|   |       |   | RUC | RUC |
|   |       |   | RH  | RH  |
| 2 | HYKSO | A | J   | J   |
|   |       |   | C   | C   |
|   |       |   | RH  | 0   |
|   |       |   | LH  | LH  |
|   |       |   | LUC | LUC |
|   |       |   | RUC | RUC |
|   |       |   | J   | J   |
|   |       |   | C   | C   |
|   |       |   | C   | C   |
|   |       |   | LH  | LH  |
|   |       |   | RH  | C   |
|   |       |   | LUC | LH  |
|   |       |   | RUC | RUC |
|   |       |   | J   | J   |
|   |       |   | LUC | LUC |
|   |       |   | RH  | RH  |

|   |       |   |     |     |
|---|-------|---|-----|-----|
|   |       |   | LH  | LUC |
|   |       |   | RUC | C   |
|   |       |   | J   | J   |
|   |       |   | C   | C   |
|   |       |   | LH  | J   |
|   |       |   | C   | C   |
|   |       |   | J   | J   |
|   |       |   | RUC | RUC |
|   |       |   | LUC | LUC |
|   |       |   | RH  | C   |
|   |       |   | J   | J   |
|   |       |   | RH  | RH  |
|   |       |   | LH  | LH  |
|   |       |   | RH  | C   |
|   |       |   | LH  | LUC |
|   |       |   | RUC | RUC |
|   |       |   | LUC | LUC |
|   |       |   | RUC | RH  |
|   |       |   | LUC | LUC |
|   |       |   | C   | C   |
|   |       |   | LH  | LUC |
|   |       |   | C   | C   |
|   |       |   | RUC | RUC |
|   |       |   | LUC | LUC |
|   |       |   | J   | J   |
|   |       |   | RH  | C   |
|   |       |   | RUC | RUC |
|   |       |   | LH  | J   |
|   |       |   | RH  | RH  |
|   |       |   | RUC | C   |
|   |       |   | C   | C   |
|   |       |   | J   | J   |
|   |       |   | C   | C   |
|   |       |   | LUC | LUC |
|   |       |   | LH  | LH  |
|   |       |   | J   | J   |
|   |       |   | RUC | RUC |
|   |       |   | RH  | RH  |
| 3 | HYKSO | A | C   | C   |
|   |       |   | J   | J   |
|   |       |   | LH  | LH  |
|   |       |   | RH  | 0   |

|  |  |  |     |     |
|--|--|--|-----|-----|
|  |  |  | RUC | RUC |
|  |  |  | LUC | LUC |
|  |  |  | C   | C   |
|  |  |  | J   | J   |
|  |  |  | RH  | RUC |
|  |  |  | LH  | 0   |
|  |  |  | LH  | LUC |
|  |  |  | RUC | C   |
|  |  |  | LUC | RUC |
|  |  |  | C   | RUC |
|  |  |  | RUC | RUC |
|  |  |  | RH  | 0   |
|  |  |  | RUC | C   |
|  |  |  | LH  | J   |
|  |  |  | C   | J   |
|  |  |  | J   | C   |
|  |  |  | RH  | J   |
|  |  |  | J   | 0   |
|  |  |  | C   | LUC |
|  |  |  | RH  | 0   |
|  |  |  | RUC | 0   |
|  |  |  | LH  | LH  |
|  |  |  | LUC | 0   |
|  |  |  | LH  | 0   |
|  |  |  | RH  | 0   |
|  |  |  | LH  | J   |
|  |  |  | RH  | LUC |
|  |  |  | LUC | RUC |
|  |  |  | RH  | J   |
|  |  |  | LUC | 0   |
|  |  |  | RUC | C   |
|  |  |  | J   | 0   |
|  |  |  | RH  | LUC |
|  |  |  | C   | RUC |
|  |  |  | LUC | 0   |
|  |  |  | RUC | J   |
|  |  |  | C   | 0   |
|  |  |  | LH  | 0   |
|  |  |  | LUC | 0   |
|  |  |  | RH  | RH  |
|  |  |  | LUC | 0   |
|  |  |  | LH  | 0   |

|   |        |   |     |     |
|---|--------|---|-----|-----|
|   |        |   | J   | J   |
|   |        |   | C   | C   |
|   |        |   | J   | J   |
|   |        |   | RUC | RUC |
|   |        |   | RH  | 0   |
|   |        |   | C   | 0   |
|   |        |   | LUC | J   |
|   |        |   | LH  | LH  |
| 3 | CORNER | A | C   | C   |
|   |        |   | J   | J   |
|   |        |   | LH  | C   |
|   |        |   | RH  | J   |
|   |        |   | LUC | LUC |
|   |        |   | RUC | RUC |
|   |        |   | C   | C   |
|   |        |   | J   | J   |
|   |        |   | J   | J   |
|   |        |   | LH  | LH  |
|   |        |   | LH  | LH  |
|   |        |   | RUC | RUC |
|   |        |   | LUC | LUC |
|   |        |   | J   | J   |
|   |        |   | LH  | C   |
|   |        |   | RUC | RUC |
|   |        |   | RH  | J   |
|   |        |   | LUC | LUC |
|   |        |   | C   | J   |
|   |        |   | J   | C   |
|   |        |   | LH  | C   |
|   |        |   | J   | J   |
|   |        |   | C   | C   |
|   |        |   | RH  | J   |
|   |        |   | RUC | RUC |
|   |        |   | LH  | C   |
|   |        |   | C   | C   |
|   |        |   | LH  | LH  |
|   |        |   | RH  | RH  |
|   |        |   | LH  | LUC |
|   |        |   | RH  | LUC |
|   |        |   | LUC | J   |
|   |        |   | RUC | RUC |
|   |        |   | LH  | LH  |

|   |       |   |     |     |
|---|-------|---|-----|-----|
|   |       |   | RH  | J   |
|   |       |   | J   | J   |
|   |       |   | RH  | J   |
|   |       |   | C   | C   |
|   |       |   | LUC | LUC |
|   |       |   | RUC | RUC |
|   |       |   | C   | C   |
|   |       |   | LH  | LH  |
|   |       |   | LUC | LUC |
|   |       |   | RH  | RH  |
|   |       |   | 0   | 0   |
|   |       |   | 0   | 0   |
|   |       |   | J   | J   |
|   |       |   | C   | C   |
|   |       |   | J   | J   |
|   |       |   | LH  | C   |
|   |       |   | LH  | C   |
|   |       |   | C   | C   |
|   |       |   | LUC | LUC |
|   |       |   | LH  | C   |
| 4 | HYKSO | F | J   | J   |
|   |       |   | C   | C   |
|   |       |   | RH  | RH  |
|   |       |   | LH  | LH  |
|   |       |   | LUC | LUC |
|   |       |   | 0   | J   |
|   |       |   | RUC | RUC |
|   |       |   | J   | J   |
|   |       |   | C   | C   |
|   |       |   | C   | C   |
|   |       |   | LH  | LH  |
|   |       |   | RH  | RH  |
|   |       |   | LUC | LH  |
|   |       |   | RUC | RUC |
|   |       |   | J   | J   |
|   |       |   | LUC | LUC |
|   |       |   | RH  | RUC |
|   |       |   | LH  | LH  |
|   |       |   | RUC | RH  |
|   |       |   | J   | J   |
|   |       |   | C   | C   |
|   |       |   | LH  | LH  |

|   |        |   |     |     |
|---|--------|---|-----|-----|
|   |        |   | C   | C   |
|   |        |   | J   | J   |
|   |        |   | RUC | RUC |
|   |        |   | LUC | LUC |
|   |        |   | RH  | RUC |
|   |        |   | J   | J   |
|   |        |   | RH  | RUC |
|   |        |   | LH  | LH  |
|   |        |   | RH  | RH  |
|   |        |   | LH  | LH  |
|   |        |   | RUC | RH  |
|   |        |   | LUC | J   |
|   |        |   | RUC | RUC |
|   |        |   | LUC | LUC |
|   |        |   | C   | C   |
|   |        |   | LH  | LH  |
|   |        |   | C   | C   |
|   |        |   | RUC | RUC |
|   |        |   | LUC | LH  |
|   |        |   | J   | J   |
|   |        |   | RH  | RH  |
|   |        |   | RUC | RUC |
|   |        |   | LH  | LH  |
|   |        |   | 0   | J   |
|   |        |   | RH  | RUC |
|   |        |   | RUC | RUC |
|   |        |   | C   | C   |
|   |        |   | J   | J   |
|   |        |   | C   | C   |
|   |        |   | LUC | LUC |
|   |        |   | LH  | LUC |
|   |        |   | J   | J   |
|   |        |   | 0   | J   |
|   |        |   | RH  | RUC |
|   |        |   | 0   | J   |
|   |        |   | RUC | RUC |
| 4 | CORNER | F | J   | J   |
|   |        |   | C   | 0   |
|   |        |   | RH  | RH  |
|   |        |   | LH  | LH  |
|   |        |   | LUC | LUC |
|   |        |   | RUC | RUC |



|  |  |  |     |     |
|--|--|--|-----|-----|
|  |  |  | J   | C   |
|  |  |  | C   | J   |
|  |  |  | C   | C   |
|  |  |  | LH  | LH  |
|  |  |  | RH  | RH  |
|  |  |  | LUC | LUC |
|  |  |  | RUC | RUC |
|  |  |  | J   | LH  |
|  |  |  | LUC | RH  |
|  |  |  | RH  | LUC |
|  |  |  | LH  | RUC |
|  |  |  | RUC | LH  |
|  |  |  | J   | LH  |
|  |  |  | C   | J   |
|  |  |  | LH  | C   |
|  |  |  | C   | C   |
|  |  |  | J   | J   |
|  |  |  | RUC | RH  |
|  |  |  | LUC | LUC |
|  |  |  | RH  | RH  |
|  |  |  | J   | LH  |
|  |  |  | RH  | RH  |
|  |  |  | LH  | LH  |
|  |  |  | RH  | RH  |
|  |  |  | LH  | LH  |
|  |  |  | RUC | RUC |
|  |  |  | LUC | LUC |
|  |  |  | RUC | RUC |
|  |  |  | LUC | LUC |
|  |  |  | C   | C   |
|  |  |  | LH  | LH  |
|  |  |  | C   | C   |
|  |  |  | RUC | RUC |
|  |  |  | LUC | LUC |
|  |  |  | J   | J   |
|  |  |  | RH  | RH  |
|  |  |  | RUC | RUC |
|  |  |  | LH  | LH  |
|  |  |  | RH  | RH  |
|  |  |  | RUC | RUC |
|  |  |  | C   | C   |
|  |  |  | J   | J   |

|   |       |   |     |     |
|---|-------|---|-----|-----|
|   |       |   | C   | C   |
|   |       |   | LUC | LUC |
|   |       |   | LH  | LH  |
|   |       |   | J   | J   |
|   |       |   | RUC | RUC |
|   |       |   | RH  | RH  |
| 5 | HYKSO | A | J   | J   |
|   |       |   | C   | C   |
|   |       |   | RH  | RUC |
|   |       |   | LH  | 0   |
|   |       |   | LUC | LUC |
|   |       |   | RUC | RH  |
|   |       |   | J   | J   |
|   |       |   | C   | C   |
|   |       |   | C   | C   |
|   |       |   | LH  | 0   |
|   |       |   | RH  | RH  |
|   |       |   | LUC | LUC |
|   |       |   | RUC | RUC |
|   |       |   | J   | J   |
|   |       |   | LUC | LUC |
|   |       |   | RH  | RUC |
|   |       |   | LH  | LH  |
|   |       |   | RUC | RUC |
|   |       |   | J   | J   |
|   |       |   | C   | C   |
|   |       |   | LH  | 0   |
|   |       |   | C   | C   |
|   |       |   | J   | 0   |
|   |       |   | RUC | RUC |
|   |       |   | LUC | LUC |
|   |       |   | RH  | RUC |
|   |       |   | J   | J   |
|   |       |   | RH  | 0   |
|   |       |   | LH  | J   |
|   |       |   | RH  | RH  |
|   |       |   | LH  | 0   |
|   |       |   | RUC | RUC |
|   |       |   | LUC | LH  |
|   |       |   | RUC | RUC |
|   |       |   | LUC | LUC |
|   |       |   | C   | C   |

|   |        |   |     |     |
|---|--------|---|-----|-----|
|   |        |   | LH  | LH  |
|   |        |   | C   | C   |
|   |        |   | RUC | RUC |
|   |        |   | LUC | LUC |
|   |        |   | J   | J   |
|   |        |   | RH  | RH  |
|   |        |   | RUC | 0   |
|   |        |   | LH  | LH  |
|   |        |   | RH  | RUC |
|   |        |   | RUC | RH  |
|   |        |   | C   | C   |
|   |        |   | J   | J   |
|   |        |   | J   | J   |
|   |        |   | LUC | LUC |
|   |        |   | LH  | 0   |
|   |        |   | C   | C   |
|   |        |   | RUC | 0   |
|   |        |   | RH  | RUC |
| 5 | CORNER | A | J   | J   |
|   |        |   | C   | C   |
|   |        |   | RH  | RH  |
|   |        |   | LH  | LH  |
|   |        |   | LUC | LUC |
|   |        |   | RUC | RUC |
|   |        |   | J   | J   |
|   |        |   | C   | C   |
|   |        |   | C   | C   |
|   |        |   | LH  | LH  |
|   |        |   | RH  | RUC |
|   |        |   | LUC | LUC |
|   |        |   | RUC | RUC |
|   |        |   | J   | 0   |
|   |        |   | LUC | LUC |
|   |        |   | RH  | RUC |
|   |        |   | LH  | LH  |
|   |        |   | RUC | 0   |
|   |        |   | J   | J   |
|   |        |   | C   | C   |
|   |        |   | LH  | LH  |
|   |        |   | C   | C   |
|   |        |   | J   | J   |
|   |        |   | RUC | 0   |

|   |       |   |     |     |
|---|-------|---|-----|-----|
|   |       |   | LUC | LUC |
|   |       |   | RH  | 0   |
|   |       |   | J   | J   |
|   |       |   | RH  | RH  |
|   |       |   | LH  | J   |
|   |       |   | RH  | 0   |
|   |       |   | LH  | LH  |
|   |       |   | RUC | RUC |
|   |       |   | LUC | LUC |
|   |       |   | RUC | 0   |
|   |       |   | LUC | LUC |
|   |       |   | C   | C   |
|   |       |   | LH  | LH  |
|   |       |   | C   | C   |
|   |       |   | RUC | RUC |
|   |       |   | LUC | LUC |
|   |       |   | J   | J   |
|   |       |   | RH  | RH  |
|   |       |   | RUC | RUC |
|   |       |   | LH  | LH  |
|   |       |   | RH  | RH  |
|   |       |   | RUC | RUC |
|   |       |   | C   | C   |
|   |       |   | J   | J   |
|   |       |   | C   | C   |
|   |       |   | LUC | LUC |
|   |       |   | LH  | LH  |
|   |       |   | J   | 0   |
|   |       |   | RUC | RUC |
|   |       |   | RH  | RUC |
| 6 | HYKSO | A | J   | J   |
|   |       |   | C   | C   |
|   |       |   | RH  | RH  |
|   |       |   | LH  | LH  |
|   |       |   | LUC | LUC |
|   |       |   | RUC | RUC |
|   |       |   | J   | LH  |
|   |       |   | C   | C   |
|   |       |   | C   | C   |
|   |       |   | LH  | LH  |
|   |       |   | RH  | RH  |
|   |       |   | LUC | LH  |

|  |  |  |     |     |
|--|--|--|-----|-----|
|  |  |  | RUC | RUC |
|  |  |  | J   | J   |
|  |  |  | LUC | LUC |
|  |  |  | RH  | RH  |
|  |  |  | LH  | LH  |
|  |  |  | RUC | RUC |
|  |  |  | J   | J   |
|  |  |  | C   | C   |
|  |  |  | LH  | LH  |
|  |  |  | C   | C   |
|  |  |  | J   | J   |
|  |  |  | RUC | RH  |
|  |  |  | LUC | LUC |
|  |  |  | RH  | RH  |
|  |  |  | J   | J   |
|  |  |  | RH  | RH  |
|  |  |  | LH  | LH  |
|  |  |  | RH  | C   |
|  |  |  | LH  | J   |
|  |  |  | RUC | RUC |
|  |  |  | LUC | LUC |
|  |  |  | RUC | RUC |
|  |  |  | LUC | LH  |
|  |  |  | 0   | J   |
|  |  |  | C   | C   |
|  |  |  | LH  | LH  |
|  |  |  | C   | C   |
|  |  |  | RUC | RUC |
|  |  |  | LUC | LUC |
|  |  |  | J   | J   |
|  |  |  | RH  | RH  |
|  |  |  | RUC | RUC |
|  |  |  | LH  | LUC |
|  |  |  | RH  | RH  |
|  |  |  | RUC | RUC |
|  |  |  | C   | C   |
|  |  |  | J   | J   |
|  |  |  | C   | C   |
|  |  |  | LUC | LUC |
|  |  |  | LH  | LH  |
|  |  |  | J   | J   |
|  |  |  | RUC | RUC |

|   |        |   |     |     |
|---|--------|---|-----|-----|
|   |        |   | RH  | RH  |
| 6 | CORNER | A | J   | J   |
|   |        |   | C   | C   |
|   |        |   | RH  | RUC |
|   |        |   | LH  | LUC |
|   |        |   | LUC | LUC |
|   |        |   | RUC | RUC |
|   |        |   | J   | J   |
|   |        |   | C   | C   |
|   |        |   | C   | C   |
|   |        |   | LH  | J   |
|   |        |   | RH  | RUC |
|   |        |   | LUC | LUC |
|   |        |   | RUC | RUC |
|   |        |   | J   | J   |
|   |        |   | LUC | RUC |
|   |        |   | RH  | LUC |
|   |        |   | LH  | LH  |
|   |        |   | RUC | RUC |
|   |        |   | J   | J   |
|   |        |   | C   | LH  |
|   |        |   | LH  | C   |
|   |        |   | C   | J   |
|   |        |   | J   | C   |
|   |        |   | RUC | RUC |
|   |        |   | LUC | LUC |
|   |        |   | RH  | RH  |
|   |        |   | J   | 0   |
|   |        |   | RH  | RH  |
|   |        |   | LH  | J   |
|   |        |   | RH  | LH  |
|   |        |   | LH  | LH  |
|   |        |   | RUC | RUC |
|   |        |   | LUC | LUC |
|   |        |   | RUC | RUC |
|   |        |   | LUC | LUC |
|   |        |   | C   | C   |
|   |        |   | LH  | C   |
|   |        |   | C   | LH  |
|   |        |   | RUC | RUC |
|   |        |   | LUC | LH  |
|   |        |   | J   | J   |

|   |       |   |     |     |
|---|-------|---|-----|-----|
|   |       |   | RH  | RH  |
|   |       |   | RUC | LH  |
|   |       |   | LH  | RUC |
|   |       |   | RH  | RH  |
|   |       |   | RUC | RUC |
|   |       |   | C   | C   |
|   |       |   | J   | J   |
|   |       |   | C   | C   |
|   |       |   | LUC | LH  |
|   |       |   | LH  | LH  |
|   |       |   | C   | C   |
|   |       |   | RUC | RUC |
|   |       |   | RH  | RH  |
| 7 | HYKSO | A | C   | C   |
|   |       |   | J   | J   |
|   |       |   | LH  | LH  |
|   |       |   | RH  | J   |
|   |       |   | RUC | RUC |
|   |       |   | LUC | LH  |
|   |       |   | C   | C   |
|   |       |   | J   | J   |
|   |       |   | J   | J   |
|   |       |   | RH  | J   |
|   |       |   | LH  | C   |
|   |       |   | RUC | RUC |
|   |       |   | LUC | LUC |
|   |       |   | J   | J   |
|   |       |   | RUC | RUC |
|   |       |   | LH  | LUC |
|   |       |   | RH  | RH  |
|   |       |   | LUC | LUC |
|   |       |   | C   | C   |
|   |       |   | J   | J   |
|   |       |   | RH  | RH  |
|   |       |   | J   | J   |
|   |       |   | C   | C   |
|   |       |   | LUC | LH  |
|   |       |   | RUC | RUC |
|   |       |   | LH  | LH  |
|   |       |   | C   | C   |
|   |       |   | LH  | LH  |
|   |       |   | RUC | RUC |

|   |        |   |     |     |
|---|--------|---|-----|-----|
|   |        |   | LH  | C   |
|   |        |   | RH  | RH  |
|   |        |   | LUC | LUC |
|   |        |   | RUC | RUC |
|   |        |   | LUC | LUC |
|   |        |   | RUC | RUC |
|   |        |   | J   | J   |
|   |        |   | RH  | RH  |
|   |        |   | C   | C   |
|   |        |   | LUC | LUC |
|   |        |   | RUC | RUC |
|   |        |   | C   | C   |
|   |        |   | LH  | C   |
|   |        |   | LUC | LH  |
|   |        |   | RH  | RUC |
|   |        |   | LH  | C   |
|   |        |   | LUC | LUC |
|   |        |   | J   | J   |
|   |        |   | C   | C   |
|   |        |   | J   | J   |
|   |        |   | RUC | RUC |
|   |        |   | RH  | J   |
|   |        |   | C   | C   |
|   |        |   | LUC | LUC |
|   |        |   | LH  | LUC |
| 7 | CORNER | A | C   | C   |
|   |        |   | J   | J   |
|   |        |   | LH  | LH  |
|   |        |   | RH  | RH  |
|   |        |   | RUC | RUC |
|   |        |   | LUC | LUC |
|   |        |   | C   | J   |
|   |        |   | J   | C   |
|   |        |   | J   | J   |
|   |        |   | RH  | RUC |
|   |        |   | LH  | RUC |
|   |        |   | RUC | LH  |
|   |        |   | LUC | LUC |
|   |        |   | C   | C   |
|   |        |   | RUC | RUC |
|   |        |   | LH  | LH  |
|   |        |   | RH  | RH  |



|   |       |   |     |     |
|---|-------|---|-----|-----|
|   |       |   | LUC | LUC |
|   |       |   | C   | C   |
|   |       |   | J   | J   |
|   |       |   | RH  | RUC |
|   |       |   | J   | J   |
|   |       |   | C   | C   |
|   |       |   | LUC | LUC |
|   |       |   | RUC | RUC |
|   |       |   | LH  | LUC |
|   |       |   | C   | C   |
|   |       |   | LH  | LH  |
|   |       |   | RH  | LH  |
|   |       |   | LH  | RUC |
|   |       |   | RH  | RH  |
|   |       |   | LUC | LUC |
|   |       |   | RUC | RUC |
|   |       |   | LUC | LH  |
|   |       |   | RUC | RUC |
|   |       |   | J   | J   |
|   |       |   | RH  | RH  |
|   |       |   | J   | J   |
|   |       |   | LUC | LUC |
|   |       |   | RUC | RUC |
|   |       |   | C   | C   |
|   |       |   | LH  | C   |
|   |       |   | LUC | LH  |
|   |       |   | RH  | RUC |
|   |       |   | LH  | LH  |
|   |       |   | LUC | LUC |
|   |       |   | J   | J   |
|   |       |   | C   | C   |
|   |       |   | J   | J   |
|   |       |   | LUC | LUC |
|   |       |   | RH  | RH  |
|   |       |   | C   | C   |
|   |       |   | RUC | RUC |
|   |       |   | LH  | LH  |
| 8 | HYKSO | F | J   | J   |
|   |       |   | C   | C   |
|   |       |   | RH  | C   |
|   |       |   | LH  | J   |
|   |       |   | LUC | LUC |

|  |  |  |     |     |
|--|--|--|-----|-----|
|  |  |  | RUC | RH  |
|  |  |  | J   | J   |
|  |  |  | C   | C   |
|  |  |  | C   | C   |
|  |  |  | LH  | LUC |
|  |  |  | RH  | C   |
|  |  |  | LUC | LUC |
|  |  |  | RUC | RUC |
|  |  |  | J   | J   |
|  |  |  | LUC | LUC |
|  |  |  | RH  | C   |
|  |  |  | LH  | J   |
|  |  |  | RUC | RH  |
|  |  |  | J   | J   |
|  |  |  | C   | C   |
|  |  |  | LH  | J   |
|  |  |  | C   | C   |
|  |  |  | J   | J   |
|  |  |  | RUC | RUC |
|  |  |  | LUC | 0   |
|  |  |  | RH  | C   |
|  |  |  | J   | J   |
|  |  |  | RH  | RH  |
|  |  |  | LH  | J   |
|  |  |  | RH  | C   |
|  |  |  | LH  | 0   |
|  |  |  | RUC | RH  |
|  |  |  | LUC | LUC |
|  |  |  | RUC | RUC |
|  |  |  | LUC | 0   |
|  |  |  | C   | C   |
|  |  |  | LH  | LH  |
|  |  |  | C   | C   |
|  |  |  | RUC | RUC |
|  |  |  | LUC | LUC |
|  |  |  | J   | J   |
|  |  |  | RH  | C   |
|  |  |  | RUC | RUC |
|  |  |  | LH  | LH  |
|  |  |  | RH  | RH  |
|  |  |  | RUC | RUC |
|  |  |  | C   | C   |

|   |        |   |     |     |
|---|--------|---|-----|-----|
|   |        |   | J   | J   |
|   |        |   | C   | C   |
|   |        |   | LUC | LUC |
|   |        |   | LH  | LH  |
|   |        |   | J   | J   |
|   |        |   | RUC | RUC |
|   |        |   | RH  | RH  |
| 8 | CORNER | F | J   | J   |
|   |        |   | C   | C   |
|   |        |   | RH  | RH  |
|   |        |   | LH  | J   |
|   |        |   | LUC | LUC |
|   |        |   | RUC | RUC |
|   |        |   | J   | J   |
|   |        |   | C   | C   |
|   |        |   | C   | C   |
|   |        |   | LH  | J   |
|   |        |   | RH  | RH  |
|   |        |   | LUC | LUC |
|   |        |   | RUC | RUC |
|   |        |   | J   | J   |
|   |        |   | LUC | LUC |
|   |        |   | RH  | RH  |
|   |        |   | LH  | J   |
|   |        |   | RUC | RUC |
|   |        |   | J   | J   |
|   |        |   | C   | C   |
|   |        |   | LH  | LH  |
|   |        |   | C   | C   |
|   |        |   | J   | J   |
|   |        |   | RUC | RUC |
|   |        |   | LUC | LUC |
|   |        |   | RH  | C   |
|   |        |   | J   | J   |
|   |        |   | RUC | RUC |
|   |        |   | LUC | LUC |
|   |        |   | RUC | RUC |
|   |        |   | LH  | J   |
|   |        |   | RUC | RUC |
|   |        |   | LUC | LUC |
|   |        |   | RUC | RUC |
|   |        |   | LUC | LUC |

|   |       |   |     |     |
|---|-------|---|-----|-----|
|   |       |   | C   | C   |
|   |       |   | LH  | J   |
|   |       |   | C   | C   |
|   |       |   | RUC | RUC |
|   |       |   | LUC | LUC |
|   |       |   | J   | J   |
|   |       |   | RH  | C   |
|   |       |   | RUC | RUC |
|   |       |   | LH  | LH  |
|   |       |   | RH  | RH  |
|   |       |   | RUC | RUC |
|   |       |   | J   | J   |
|   |       |   | C   | C   |
|   |       |   | C   | C   |
|   |       |   | LUC | LUC |
|   |       |   | LH  | J   |
|   |       |   | J   | J   |
|   |       |   | RUC | RUC |
|   |       |   | RH  | RH  |
| 9 | HYKSO | F | J   | J   |
|   |       |   | C   | C   |
|   |       |   | RH  | RH  |
|   |       |   | LH  | LH  |
|   |       |   | LUC | LH  |
|   |       |   | RUC | C   |
|   |       |   | J   | J   |
|   |       |   | C   | C   |
|   |       |   | C   | C   |
|   |       |   | LH  | LH  |
|   |       |   | RH  | C   |
|   |       |   | LUC | LH  |
|   |       |   | RUC | C   |
|   |       |   | J   | J   |
|   |       |   | LUC | LH  |
|   |       |   | RH  | C   |
|   |       |   | LH  | J   |
|   |       |   | RUC | RH  |
|   |       |   | J   | J   |
|   |       |   | C   | C   |
|   |       |   | LH  | J   |
|   |       |   | C   | C   |
|   |       |   | J   | J   |

|   |        |   |     |     |
|---|--------|---|-----|-----|
|   |        |   | RUC | C   |
|   |        |   | LH  | J   |
|   |        |   | RUC | C   |
|   |        |   | J   | J   |
|   |        |   | RH  | RH  |
|   |        |   | LH  | LH  |
|   |        |   | RH  | C   |
|   |        |   | LH  | LH  |
|   |        |   | RUC | C   |
|   |        |   | LUC | LUC |
|   |        |   | RUC | C   |
|   |        |   | LUC | LH  |
|   |        |   | C   | C   |
|   |        |   | LH  | LH  |
|   |        |   | C   | C   |
|   |        |   | RUC | C   |
|   |        |   | LUC | LH  |
|   |        |   | J   | J   |
|   |        |   | RH  | C   |
|   |        |   | RUC | 0   |
|   |        |   | LH  | LH  |
|   |        |   | RH  | C   |
|   |        |   | RUC | RH  |
|   |        |   | C   | C   |
|   |        |   | J   | J   |
|   |        |   | C   | C   |
|   |        |   | LUC | LUC |
|   |        |   | LH  | LH  |
|   |        |   | J   | J   |
|   |        |   | RUC | RUC |
|   |        |   | RH  | RH  |
| 9 | CORNER | F |     |     |
|   |        |   | J   | J   |
|   |        |   | C   | C   |
|   |        |   | RH  | C   |
|   |        |   | LH  | LH  |
|   |        |   | LUC | LUC |
|   |        |   | RUC | C   |
|   |        |   | J   | J   |
|   |        |   | C   | C   |
|   |        |   | C   | C   |
|   |        |   | LH  | LH  |

|  |  |  |     |     |
|--|--|--|-----|-----|
|  |  |  | RH  | C   |
|  |  |  | LUC | LH  |
|  |  |  | RUC | C   |
|  |  |  | J   | J   |
|  |  |  | LUC | LUC |
|  |  |  | RH  | RH  |
|  |  |  | LH  | LH  |
|  |  |  | RUC | C   |
|  |  |  | J   | J   |
|  |  |  | C   | C   |
|  |  |  | LH  | LH  |
|  |  |  | C   | C   |
|  |  |  | J   | J   |
|  |  |  | RUC | RH  |
|  |  |  | LUC | LUC |
|  |  |  | RH  | RH  |
|  |  |  | J   | J   |
|  |  |  | RH  | C   |
|  |  |  | LH  | LH  |
|  |  |  | RH  | C   |
|  |  |  | LH  | J   |
|  |  |  | RUC | RUC |
|  |  |  | LUC | LH  |
|  |  |  | RUC | C   |
|  |  |  | LUC | LUC |
|  |  |  | C   | C   |
|  |  |  | LH  | J   |
|  |  |  | C   | C   |
|  |  |  | RH  | C   |
|  |  |  | RUC | RUC |
|  |  |  | J   | J   |
|  |  |  | RH  | RH  |
|  |  |  | RUC | C   |
|  |  |  | LH  | LH  |
|  |  |  | RH  | RH  |
|  |  |  | RUC | C   |
|  |  |  | C   | C   |
|  |  |  | J   | J   |
|  |  |  | C   | C   |
|  |  |  | LUC | LUC |
|  |  |  | LH  | LH  |
|  |  |  | J   | J   |

|    |       |   |     |     |
|----|-------|---|-----|-----|
|    |       |   | RUC | C   |
|    |       |   | RH  | C   |
| 10 | HYKSO | A | J   | J   |
|    |       |   | C   | C   |
|    |       |   | RH  | 0   |
|    |       |   | LH  | 0   |
|    |       |   | LUC | 0   |
|    |       |   | RUC | 0   |
|    |       |   | J   | 0   |
|    |       |   | C   | C   |
|    |       |   | C   | C   |
|    |       |   | LH  | 0   |
|    |       |   | RH  | 0   |
|    |       |   | LUC | 0   |
|    |       |   | RUC | RUC |
|    |       |   | J   | J   |
|    |       |   | LUC | 0   |
|    |       |   | RH  | RH  |
|    |       |   | LH  | LH  |
|    |       |   | RUC | RUC |
|    |       |   | J   | J   |
|    |       |   | C   | C   |
|    |       |   | LH  | 0   |
|    |       |   | C   | C   |
|    |       |   | J   | J   |
|    |       |   | RH  | RH  |
|    |       |   | LUC | 0   |
|    |       |   | RH  | 0   |
|    |       |   | J   | J   |
|    |       |   | RH  | RH  |
|    |       |   | LH  | 0   |
|    |       |   | RH  | 0   |
|    |       |   | LH  | 0   |
|    |       |   | RUC | RUC |
|    |       |   | LUC | 0   |
|    |       |   | RUC | RUC |
|    |       |   | LUC | 0   |
|    |       |   | C   | C   |
|    |       |   | LH  | LH  |
|    |       |   | C   | C   |
|    |       |   | RUC | RUC |
|    |       |   | LUC | LUC |

|    |        |   |     |     |
|----|--------|---|-----|-----|
|    |        |   | J   | J   |
|    |        |   | RH  | C   |
|    |        |   | RUC | RUC |
|    |        |   | LH  | LH  |
|    |        |   | RH  | RH  |
|    |        |   | RUC | 0   |
|    |        |   | C   | C   |
|    |        |   | J   | J   |
|    |        |   | C   | C   |
|    |        |   | LUC | LUC |
|    |        |   | LH  | LH  |
|    |        |   | C   | C   |
|    |        |   | RUC | RUC |
|    |        |   | RH  | RH  |
| 10 | CORNER | A | J   | J   |
|    |        |   | C   | C   |
|    |        |   | RH  | RH  |
|    |        |   | LH  | LH  |
|    |        |   | LUR | LUC |
|    |        |   | RUC | RUC |
|    |        |   | J   | J   |
|    |        |   | C   | C   |
|    |        |   | C   | C   |
|    |        |   | LH  | LH  |
|    |        |   | RH  | RH  |
|    |        |   | LUC | LH  |
|    |        |   | RUC | RUC |
|    |        |   | J   | J   |
|    |        |   | LUC | LUC |
|    |        |   | RH  | RH  |
|    |        |   | LH  | LH  |
|    |        |   | RUC | RUC |
|    |        |   | J   | J   |
|    |        |   | C   | C   |
|    |        |   | LH  | LH  |
|    |        |   | C   | C   |
|    |        |   | J   | J   |
|    |        |   | RUC | RUC |
|    |        |   | LUC | LH  |
|    |        |   | RH  | RH  |
|    |        |   | J   | J   |
|    |        |   | RH  | RH  |



|    |       |   |     |     |
|----|-------|---|-----|-----|
|    |       |   | LH  | LH  |
|    |       |   | RH  | RH  |
|    |       |   | LH  | LH  |
|    |       |   | RUC | RUC |
|    |       |   | LUC | LUC |
|    |       |   | RUC | RUC |
|    |       |   | LUC | LUC |
|    |       |   | C   | C   |
|    |       |   | LH  | LH  |
|    |       |   | C   | C   |
|    |       |   | RUC | RUC |
|    |       |   | LUC | LUC |
|    |       |   | J   | J   |
|    |       |   | RH  | RH  |
|    |       |   | RUC | RUC |
|    |       |   | LH  | J   |
|    |       |   | RH  | RH  |
|    |       |   | RUC | RUC |
|    |       |   | C   | C   |
|    |       |   | J   | J   |
|    |       |   | C   | C   |
|    |       |   | LUC | LH  |
|    |       |   | LH  | LH  |
|    |       |   | J   | J   |
|    |       |   | RUC | RUC |
|    |       |   | RH  | RH  |
| 11 | HYKSO | A | J   | J   |
|    |       |   | C   | C   |
|    |       |   | RH  | RH  |
|    |       |   | LH  | LH  |
|    |       |   | LUC | LUC |
|    |       |   | RUC | RUC |
|    |       |   | J   | J   |
|    |       |   | C   | C   |
|    |       |   | C   | C   |
|    |       |   | LH  | J   |
|    |       |   | RH  | RUC |
|    |       |   | LUC | LUC |
|    |       |   | RUC | RUC |
|    |       |   | J   | J   |
|    |       |   | LUC | LUC |
|    |       |   | RH  | RH  |

|    |        |   |     |     |
|----|--------|---|-----|-----|
|    |        |   | LH  | LUC |
|    |        |   | RUC | RUC |
|    |        |   | J   | J   |
|    |        |   | C   | C   |
|    |        |   | LH  | LUC |
|    |        |   | C   | C   |
|    |        |   | J   | J   |
|    |        |   | RUC | RUC |
|    |        |   | LUC | LUC |
|    |        |   | RH  | RH  |
|    |        |   | J   | J   |
|    |        |   | RH  | RH  |
|    |        |   | LH  | LH  |
|    |        |   | RH  | RH  |
|    |        |   | LH  | LH  |
|    |        |   | RUC | RUC |
|    |        |   | LUC | LUC |
|    |        |   | RUC | RH  |
|    |        |   | LUC | LUC |
|    |        |   | C   | C   |
|    |        |   | LH  | LH  |
|    |        |   | C   | C   |
|    |        |   | RUC | RUC |
|    |        |   | LUC | LUC |
|    |        |   | J   | J   |
|    |        |   | RH  | RH  |
|    |        |   | RUC | RH  |
|    |        |   | LH  | LH  |
|    |        |   | RH  | RH  |
|    |        |   | RUC | RUC |
|    |        |   | C   | C   |
|    |        |   | J   | J   |
|    |        |   | C   | C   |
|    |        |   | LUC | LUC |
|    |        |   | LH  | LUC |
|    |        |   | J   | J   |
|    |        |   | RUC | RUC |
|    |        |   | RH  | RH  |
| 11 | CORNER | A | J   | J   |
|    |        |   | C   | C   |
|    |        |   | RH  | C   |
|    |        |   | LH  | J   |

|  |  |  |     |     |
|--|--|--|-----|-----|
|  |  |  | LUC | LUC |
|  |  |  | RUC | RUC |
|  |  |  | J   | J   |
|  |  |  | C   | C   |
|  |  |  | C   | C   |
|  |  |  | LH  | J   |
|  |  |  | RH  | C   |
|  |  |  | LUC | LH  |
|  |  |  | RUC | RUC |
|  |  |  | J   | J   |
|  |  |  | LUC | LUC |
|  |  |  | RH  | RUC |
|  |  |  | LH  | LH  |
|  |  |  | RUC | RUC |
|  |  |  | J   | J   |
|  |  |  | C   | C   |
|  |  |  | LH  | LH  |
|  |  |  | C   | C   |
|  |  |  | J   | J   |
|  |  |  | RUC | RUC |
|  |  |  | LUC | LUC |
|  |  |  | RH  | C   |
|  |  |  | J   | J   |
|  |  |  | RH  | RH  |
|  |  |  | LH  | LH  |
|  |  |  | RH  | RH  |
|  |  |  | LH  | LH  |
|  |  |  | RUC | RUC |
|  |  |  | LUC | LUC |
|  |  |  | RUC | LUC |
|  |  |  | LUC | RUC |
|  |  |  | C   | C   |
|  |  |  | LH  | C   |
|  |  |  | C   | LUC |
|  |  |  | RUC | RUC |
|  |  |  | LUC | LUC |
|  |  |  | J   | J   |
|  |  |  | RH  | C   |
|  |  |  | RUC | RUC |
|  |  |  | LH  | LH  |
|  |  |  | RH  | RH  |
|  |  |  | RUC | RUC |

|    |       |   |     |     |
|----|-------|---|-----|-----|
|    |       |   | C   | C   |
|    |       |   | J   | J   |
|    |       |   | C   | C   |
|    |       |   | LUC | LUC |
|    |       |   | LH  | LH  |
|    |       |   | J   | J   |
|    |       |   | RUC | RUC |
|    |       |   | RH  | C   |
| 12 | HYKSO | A | J   | J   |
|    |       |   | C   | C   |
|    |       |   | RH  | J   |
|    |       |   | LH  | 0   |
|    |       |   | LUC | 0   |
|    |       |   | RUC | 0   |
|    |       |   | J   | J   |
|    |       |   | C   | C   |
|    |       |   | C   | C   |
|    |       |   | LH  | LH  |
|    |       |   | RH  | 0   |
|    |       |   | LUC | LUC |
|    |       |   | RUC | RUC |
|    |       |   | J   | J   |
|    |       |   | LUC | LUC |
|    |       |   | RH  | RH  |
|    |       |   | LH  | 0   |
|    |       |   | RUC | RUC |
|    |       |   | J   | J   |
|    |       |   | C   | C   |
|    |       |   | LH  | J   |
|    |       |   | C   | C   |
|    |       |   | J   | J   |
|    |       |   | RUC | RUC |
|    |       |   | LUC | LH  |
|    |       |   | RH  | RH  |
|    |       |   | J   | J   |
|    |       |   | RH  | 0   |
|    |       |   | LH  | J   |
|    |       |   | RH  | 0   |
|    |       |   | LH  | 0   |
|    |       |   | RUC | RUC |
|    |       |   | LUC | 0   |
|    |       |   | RUC | RUC |

|    |        |   |     |     |
|----|--------|---|-----|-----|
|    |        |   | LUC | 0   |
|    |        |   | C   | C   |
|    |        |   | LH  | 0   |
|    |        |   | C   | C   |
|    |        |   | RUC | RUC |
|    |        |   | LUC | 0   |
|    |        |   | J   | J   |
|    |        |   | RH  | 0   |
|    |        |   | RUC | RUC |
|    |        |   | LH  | LUC |
|    |        |   | RH  | RH  |
|    |        |   | RUC | RUC |
|    |        |   | C   | C   |
|    |        |   | J   | J   |
|    |        |   | C   | C   |
|    |        |   | LUC | LH  |
|    |        |   | LH  | 0   |
|    |        |   | J   | J   |
|    |        |   | RUC | RUC |
|    |        |   | RH  | RH  |
| 12 | CORNER | A | J   | J   |
|    |        |   | C   | C   |
|    |        |   | RH  | C   |
|    |        |   | LH  | J   |
|    |        |   | LUC | LUC |
|    |        |   | RUC | RUC |
|    |        |   | J   | J   |
|    |        |   | C   | C   |
|    |        |   | C   | C   |
|    |        |   | LH  | J   |
|    |        |   | RH  | C   |
|    |        |   | LUC | 0   |
|    |        |   | RUC | RUC |
|    |        |   | J   | J   |
|    |        |   | LUC | LUC |
|    |        |   | RH  | RH  |
|    |        |   | LH  | LH  |
|    |        |   | RUC | 0   |
|    |        |   | J   | J   |
|    |        |   | C   | C   |
|    |        |   | LH  | LH  |
|    |        |   | C   | C   |

|    |       |   |     |     |
|----|-------|---|-----|-----|
|    |       |   | J   | J   |
|    |       |   | RUC | RUC |
|    |       |   | LUC | LUC |
|    |       |   | RH  | RH  |
|    |       |   | J   | J   |
|    |       |   | RH  | RH  |
|    |       |   | LH  | LH  |
|    |       |   | RH  | RH  |
|    |       |   | LH  | J   |
|    |       |   | RUC | RUC |
|    |       |   | LUC | LUC |
|    |       |   | RUC | RUC |
|    |       |   | LUC | LUC |
|    |       |   | C   | C   |
|    |       |   | LH  | LH  |
|    |       |   | C   | C   |
|    |       |   | RUC | 0   |
|    |       |   | LUC | LUC |
|    |       |   | J   | J   |
|    |       |   | RH  | C   |
|    |       |   | RUC | RUC |
|    |       |   | LH  | LH  |
|    |       |   | RH  | C   |
|    |       |   | RUC | RUC |
|    |       |   | C   | C   |
|    |       |   | J   | J   |
|    |       |   | C   | C   |
|    |       |   | LUC | LUC |
|    |       |   | LH  | LH  |
|    |       |   | J   | J   |
|    |       |   | RUC | RUC |
|    |       |   | RH  | RH  |
| 13 | HYKSO | F | J   | J   |
|    |       |   | C   | C   |
|    |       |   | RH  | RH  |
|    |       |   | LH  | LH  |
|    |       |   | LUC | LUC |
|    |       |   | RUC | RUC |
|    |       |   | J   | J   |
|    |       |   | C   | C   |
|    |       |   | C   | C   |
|    |       |   | LH  | LH  |

|  |  |  |     |     |
|--|--|--|-----|-----|
|  |  |  | RH  | RH  |
|  |  |  | LUC | LUC |
|  |  |  | RUC | RUC |
|  |  |  | J   | J   |
|  |  |  | LUC | 0   |
|  |  |  | RH  | RH  |
|  |  |  | LH  | LH  |
|  |  |  | RUC | RUC |
|  |  |  | J   | J   |
|  |  |  | C   | C   |
|  |  |  | LH  | LH  |
|  |  |  | C   | C   |
|  |  |  | J   | J   |
|  |  |  | RUC | RUC |
|  |  |  | LUC | 0   |
|  |  |  | RH  | RH  |
|  |  |  | J   | J   |
|  |  |  | RH  | RH  |
|  |  |  | LH  | LH  |
|  |  |  | RH  | C   |
|  |  |  | LH  | LH  |
|  |  |  | RUC | RUC |
|  |  |  | LUC | LUC |
|  |  |  | RUC | RUC |
|  |  |  | LUC | LUC |
|  |  |  | J   | J   |
|  |  |  | LH  | LH  |
|  |  |  | J   | J   |
|  |  |  | RUC | RUC |
|  |  |  | LUC | LUC |
|  |  |  | J   | J   |
|  |  |  | RH  | RH  |
|  |  |  | RUC | RUC |
|  |  |  | LH  | LH  |
|  |  |  | RH  | RH  |
|  |  |  | RUC | RUC |
|  |  |  | C   | C   |
|  |  |  | J   | J   |
|  |  |  | C   | C   |
|  |  |  | LUC | LUC |
|  |  |  | LH  | LH  |
|  |  |  | J   | J   |

|    |        |   |     |     |
|----|--------|---|-----|-----|
|    |        |   | RUC | RUC |
|    |        |   | RH  | RH  |
| 13 | CORNER | F | J   | J   |
|    |        |   | C   | C   |
|    |        |   | RH  | RH  |
|    |        |   | LH  | LH  |
|    |        |   | LUC | LUC |
|    |        |   | RUC | RUC |
|    |        |   | J   | J   |
|    |        |   | C   | C   |
|    |        |   | J   | J   |
|    |        |   | RH  | C   |
|    |        |   | RH  | RH  |
|    |        |   | LUC | LUC |
|    |        |   | RUC | RUC |
|    |        |   | J   | J   |
|    |        |   | LUC | LUC |
|    |        |   | RH  | RH  |
|    |        |   | LH  | LH  |
|    |        |   | RUC | RUC |
|    |        |   | J   | J   |
|    |        |   | C   | C   |
|    |        |   | LH  | LH  |
|    |        |   | C   | C   |
|    |        |   | J   | J   |
|    |        |   | RUC | RUC |
|    |        |   | LUC | LUC |
|    |        |   | RH  | RH  |
|    |        |   | J   | J   |
|    |        |   | RH  | RH  |
|    |        |   | LH  | LH  |
|    |        |   | RH  | RH  |
|    |        |   | LH  | LH  |
|    |        |   | RUC | RUC |
|    |        |   | LUC | LUC |
|    |        |   | RUC | RUC |
|    |        |   | LUC | LUC |
|    |        |   | C   | C   |
|    |        |   | LH  | LH  |
|    |        |   | C   | C   |
|    |        |   | RUC | RUC |
|    |        |   | LUC | LUC |



|    |       |   |     |     |
|----|-------|---|-----|-----|
|    |       |   | J   | J   |
|    |       |   | RH  | RH  |
|    |       |   | RUC | RUC |
|    |       |   | LH  | LH  |
|    |       |   | RH  | RH  |
|    |       |   | RUC | RUC |
|    |       |   | C   | C   |
|    |       |   | J   | J   |
|    |       |   | C   | C   |
|    |       |   | LUC | LUC |
|    |       |   | LH  | LH  |
|    |       |   | J   | J   |
|    |       |   | RUC | RUC |
|    |       |   | RH  | RH  |
| 14 | HYKSO | F | J   | J   |
|    |       |   | 0   | J   |
|    |       |   | C   | C   |
|    |       |   | 0   | J   |
|    |       |   | RH  | RH  |
|    |       |   | LH  | LUC |
|    |       |   | LUC | 0   |
|    |       |   | 0   | J   |
|    |       |   | RUC | RUC |
|    |       |   | J   | J   |
|    |       |   | C   | C   |
|    |       |   | C   | C   |
|    |       |   | LH  | LH  |
|    |       |   | RH  | RH  |
|    |       |   | LUC | LH  |
|    |       |   | RUC | RUC |
|    |       |   | J   | J   |
|    |       |   | LUC | LUC |
|    |       |   | RH  | RUC |
|    |       |   | LH  | LH  |
|    |       |   | RUC | RH  |
|    |       |   | J   | J   |
|    |       |   | C   | C   |
|    |       |   | LH  | LH  |
|    |       |   | C   | C   |
|    |       |   | J   | J   |
|    |       |   | RUC | RUC |
|    |       |   | LUC | LH  |

|    |        |   |     |     |
|----|--------|---|-----|-----|
|    |        |   | RH  | RH  |
|    |        |   | J   | J   |
|    |        |   | RH  | RH  |
|    |        |   | LH  | LH  |
|    |        |   | RH  | RH  |
|    |        |   | LH  | LH  |
|    |        |   | RUC | RH  |
|    |        |   | LUC | LH  |
|    |        |   | RUC | RUC |
|    |        |   | LUC | LUC |
|    |        |   | C   | C   |
|    |        |   | LH  | LH  |
|    |        |   | C   | C   |
|    |        |   | RUC | RUC |
|    |        |   | LUC | LH  |
|    |        |   | J   | J   |
|    |        |   | RH  | RH  |
|    |        |   | RUC | RH  |
|    |        |   | LH  | LH  |
|    |        |   | RH  | RH  |
|    |        |   | 0   | J   |
|    |        |   | RUC | RUC |
|    |        |   | C   | C   |
|    |        |   | J   | J   |
|    |        |   | C   | C   |
|    |        |   | LUC | LUC |
|    |        |   | LH  | 0   |
|    |        |   | J   | J   |
|    |        |   | 0   | LH  |
|    |        |   | RUC | RUC |
|    |        |   | 0   | J   |
|    |        |   | RH  | C   |
| 14 | CORNER | F | J   | J   |
|    |        |   | C   | C   |
|    |        |   | RH  | RH  |
|    |        |   | LH  | LH  |
|    |        |   | 0   | RUC |
|    |        |   | LUC | LH  |
|    |        |   | 0   | RUC |
|    |        |   | 0   | J   |
|    |        |   | RUC | RUC |
|    |        |   | J   | J   |

|  |  |  |     |     |
|--|--|--|-----|-----|
|  |  |  | C   | C   |
|  |  |  | C   | C   |
|  |  |  | LH  | LH  |
|  |  |  | RH  | RH  |
|  |  |  | LUC | LUC |
|  |  |  | 0   | J   |
|  |  |  | RUC | RUC |
|  |  |  | J   | J   |
|  |  |  | LUC | LH  |
|  |  |  | 0   | RH  |
|  |  |  | RH  | RUC |
|  |  |  | LH  | LH  |
|  |  |  | RUC | RUC |
|  |  |  | J   | J   |
|  |  |  | C   | C   |
|  |  |  | LH  | J   |
|  |  |  | C   | C   |
|  |  |  | J   | J   |
|  |  |  | RUC | C   |
|  |  |  | LUC | LH  |
|  |  |  | RH  | RUC |
|  |  |  | J   | J   |
|  |  |  | RH  | RH  |
|  |  |  | 0   | RUC |
|  |  |  | LH  | LH  |
|  |  |  | RH  | RH  |
|  |  |  | LH  | LH  |
|  |  |  | 0   | RUC |
|  |  |  | RUC | C   |
|  |  |  | LUC | J   |
|  |  |  | RUC | RUC |
|  |  |  | LUC | LUC |
|  |  |  | C   | 0   |
|  |  |  | LH  | LH  |
|  |  |  | RUC | RUC |
|  |  |  | RUC | RUC |
|  |  |  | LUC | J   |
|  |  |  | 0   | C   |
|  |  |  | 0   | C   |
|  |  |  | J   | J   |
|  |  |  | RH  | RH  |
|  |  |  | RUC | RUC |

|    |       |   |     |     |
|----|-------|---|-----|-----|
|    |       |   | LH  | LH  |
|    |       |   | RH  | C   |
|    |       |   | 0   | J   |
|    |       |   | RUC | RUC |
|    |       |   | C   | C   |
|    |       |   | J   | J   |
|    |       |   | 0   | LH  |
|    |       |   | C   | RUC |
|    |       |   | 0   | C   |
|    |       |   | LUC | LH  |
|    |       |   | LH  | LH  |
|    |       |   | J   | J   |
|    |       |   | 0   | C   |
|    |       |   | 0   | LUC |
|    |       |   | RUC | RUC |
|    |       |   | 0   | C   |
|    |       |   | RH  | C   |
| 15 | HYKSO | A | J   | J   |
|    |       |   | C   | C   |
|    |       |   | RH  | 0   |
|    |       |   | LH  | 0   |
|    |       |   | LUC | 0   |
|    |       |   | RUC | 0   |
|    |       |   | J   | 0   |
|    |       |   | C   | C   |
|    |       |   | C   | C   |
|    |       |   | LH  | LUC |
|    |       |   | RH  | RH  |
|    |       |   | LUC | LH  |
|    |       |   | RUC | 0   |
|    |       |   | J   | J   |
|    |       |   | LUC | LUC |
|    |       |   | RH  | RH  |
|    |       |   | LH  | LH  |
|    |       |   | RUC | 0   |
|    |       |   | J   | J   |
|    |       |   | C   | C   |
|    |       |   | LH  | 0   |
|    |       |   | C   | C   |
|    |       |   | J   | J   |
|    |       |   | RUC | 0   |
|    |       |   | LUC | LUC |

|    |        |   |     |     |
|----|--------|---|-----|-----|
|    |        |   | RH  | RUC |
|    |        |   | J   | J   |
|    |        |   | RH  | RH  |
|    |        |   | LH  | 0   |
|    |        |   | RH  | 0   |
|    |        |   | LH  | 0   |
|    |        |   | RUC | RUC |
|    |        |   | J   | J   |
|    |        |   | RUC | RUC |
|    |        |   | LUC | 0   |
|    |        |   | C   | C   |
|    |        |   | LH  | LH  |
|    |        |   | C   | C   |
|    |        |   | RUC | RUC |
|    |        |   | LUC | LH  |
|    |        |   | J   | J   |
|    |        |   | RH  | RH  |
|    |        |   | RUC | RUC |
|    |        |   | LH  | LUC |
|    |        |   | RH  | RH  |
|    |        |   | RUC | RUC |
|    |        |   | C   | C   |
|    |        |   | J   | J   |
|    |        |   | C   | C   |
|    |        |   | LUC | LUC |
|    |        |   | LH  | LH  |
|    |        |   | J   | J   |
|    |        |   | RUC | RUC |
|    |        |   | RH  | RUC |
| 15 | CORNER | A | J   | J   |
|    |        |   | C   | C   |
|    |        |   | RH  | RH  |
|    |        |   | LH  | LH  |
|    |        |   | LUC | LUC |
|    |        |   | RUC | RUC |
|    |        |   | J   | J   |
|    |        |   | C   | C   |
|    |        |   | C   | C   |
|    |        |   | LH  | LUC |
|    |        |   | RH  | RUC |
|    |        |   | LUC | LUC |
|    |        |   | RUC | RUC |

|    |       |   |     |     |
|----|-------|---|-----|-----|
|    |       |   | J   | J   |
|    |       |   | LUC | LUC |
|    |       |   | RH  | RUC |
|    |       |   | LH  | LH  |
|    |       |   | RUC | RUC |
|    |       |   | J   | J   |
|    |       |   | C   | C   |
|    |       |   | LH  | LUC |
|    |       |   | C   | C   |
|    |       |   | J   | J   |
|    |       |   | RUC | RUC |
|    |       |   | LUC | LUC |
|    |       |   | RH  | RUC |
|    |       |   | J   | J   |
|    |       |   | RH  | RH  |
|    |       |   | LH  | LUC |
|    |       |   | RH  | RH  |
|    |       |   | LH  | LH  |
|    |       |   | RUC | RUC |
|    |       |   | LUC | LUC |
|    |       |   | RUC | RUC |
|    |       |   | LUC | LUC |
|    |       |   | C   | C   |
|    |       |   | LH  | LH  |
|    |       |   | C   | C   |
|    |       |   | RUC | RUC |
|    |       |   | LUC | LUC |
|    |       |   | J   | J   |
|    |       |   | RH  | RUC |
|    |       |   | RUC | RUC |
|    |       |   | LUC | LUC |
|    |       |   | RH  | RH  |
|    |       |   | RUC | RUC |
|    |       |   | C   | C   |
|    |       |   | J   | J   |
|    |       |   | C   | C   |
|    |       |   | LUC | LUC |
|    |       |   | LH  | LH  |
|    |       |   | J   | J   |
|    |       |   | RUC | RUC |
|    |       |   | RH  | RH  |
| 16 | HYKSO | F | J   | J   |

|  |  |  |     |     |
|--|--|--|-----|-----|
|  |  |  | C   | C   |
|  |  |  | RH  | C   |
|  |  |  | LH  | LH  |
|  |  |  | LUC | LH  |
|  |  |  | RUC | RUC |
|  |  |  | J   | J   |
|  |  |  | C   | C   |
|  |  |  | C   | C   |
|  |  |  | LH  | LH  |
|  |  |  | RH  | C   |
|  |  |  | LUC | LH  |
|  |  |  | RUC | RUC |
|  |  |  | J   | J   |
|  |  |  | LUC | LUC |
|  |  |  | RH  | C   |
|  |  |  | LH  | LH  |
|  |  |  | RUC | RH  |
|  |  |  | J   | J   |
|  |  |  | C   | C   |
|  |  |  | LH  | J   |
|  |  |  | C   | C   |
|  |  |  | J   | J   |
|  |  |  | RUC | RH  |
|  |  |  | LUC | LUC |
|  |  |  | RH  | C   |
|  |  |  | J   | J   |
|  |  |  | RH  | C   |
|  |  |  | LH  | LH  |
|  |  |  | RH  | C   |
|  |  |  | LH  | LH  |
|  |  |  | RUC | RH  |
|  |  |  | LUC | LUC |
|  |  |  | RUC | RUC |
|  |  |  | LUC | LUC |
|  |  |  | C   | C   |
|  |  |  | LH  | LH  |
|  |  |  | C   | C   |
|  |  |  | RUC | RUC |
|  |  |  | LUC | LUC |
|  |  |  | J   | J   |
|  |  |  | RH  | C   |
|  |  |  | RUC | RH  |

|    |        |   |     |     |
|----|--------|---|-----|-----|
|    |        |   | LH  | LH  |
|    |        |   | RH  | C   |
|    |        |   | RUC | RUC |
|    |        |   | C   | C   |
|    |        |   | J   | J   |
|    |        |   | C   | C   |
|    |        |   | LUC | LUC |
|    |        |   | LH  | LH  |
|    |        |   | J   | J   |
|    |        |   | RUC | RH  |
|    |        |   | RH  | C   |
| 16 | CORNER | F | J   | J   |
|    |        |   | C   | C   |
|    |        |   | RH  | C   |
|    |        |   | LH  | J   |
|    |        |   | LUC | LUC |
|    |        |   | RUC | RUC |
|    |        |   | J   | C   |
|    |        |   | C   | J   |
|    |        |   | C   | C   |
|    |        |   | LH  | J   |
|    |        |   | RH  | LUC |
|    |        |   | LUC | C   |
|    |        |   | RUC | C   |
|    |        |   | J   | J   |
|    |        |   | LUC | LUC |
|    |        |   | RH  | C   |
|    |        |   | LH  | RUC |
|    |        |   | RUC | J   |
|    |        |   | J   | J   |
|    |        |   | C   | C   |
|    |        |   | LH  | J   |
|    |        |   | C   | C   |
|    |        |   | J   | C   |
|    |        |   | RUC | J   |
|    |        |   | LUC | LUC |
|    |        |   | RH  | C   |
|    |        |   | J   | J   |
|    |        |   | RH  | C   |
|    |        |   | LH  | LH  |
|    |        |   | RH  | C   |
|    |        |   | LH  | J   |



|    |       |   |     |     |
|----|-------|---|-----|-----|
|    |       |   | RUC | RUC |
|    |       |   | LUC | LUC |
|    |       |   | RUC | RUC |
|    |       |   | LUC | LUC |
|    |       |   | C   | C   |
|    |       |   | LH  | LH  |
|    |       |   | C   | C   |
|    |       |   | RUC | LUC |
|    |       |   | LUC | C   |
|    |       |   | J   | J   |
|    |       |   | RH  | C   |
|    |       |   | RUC | C   |
|    |       |   | LH  | LH  |
|    |       |   | RH  | C   |
|    |       |   | RUC | C   |
|    |       |   | C   | J   |
|    |       |   | J   | C   |
|    |       |   | C   | C   |
|    |       |   | LUC | LUC |
|    |       |   | LH  | J   |
|    |       |   | J   | J   |
|    |       |   | RUC | RUC |
|    |       |   | RH  | C   |
| 17 | HYKSO | F | J   | J   |
|    |       |   | C   | C   |
|    |       |   | RH  | C   |
|    |       |   | LH  | LH  |
|    |       |   | LUC | LUC |
|    |       |   | RUC | RH  |
|    |       |   | J   | J   |
|    |       |   | C   | C   |
|    |       |   | C   | C   |
|    |       |   | LH  | J   |
|    |       |   | RH  | C   |
|    |       |   | LUC | LH  |
|    |       |   | RUC | RH  |
|    |       |   | J   | J   |
|    |       |   | LUC | J   |
|    |       |   | RH  | C   |
|    |       |   | LH  | J   |
|    |       |   | RUC | RUC |
|    |       |   | J   | J   |

|    |        |   |     |     |
|----|--------|---|-----|-----|
|    |        |   | C   | C   |
|    |        |   | LH  | LH  |
|    |        |   | C   | RH  |
|    |        |   | J   | J   |
|    |        |   | RUC | 0   |
|    |        |   | LUC | J   |
|    |        |   | RH  | C   |
|    |        |   | J   | J   |
|    |        |   | RH  | C   |
|    |        |   | LH  | LH  |
|    |        |   | RH  | C   |
|    |        |   | LH  | J   |
|    |        |   | RUC | RUC |
|    |        |   | LUC | LH  |
|    |        |   | RUC | RUC |
|    |        |   | LUC | J   |
|    |        |   | C   | C   |
|    |        |   | LH  | LH  |
|    |        |   | C   | C   |
|    |        |   | RUC | RUC |
|    |        |   | LUC | LH  |
|    |        |   | J   | J   |
|    |        |   | RH  | C   |
|    |        |   | RUC | RH  |
|    |        |   | LH  | J   |
|    |        |   | RH  | C   |
|    |        |   | LUC | LH  |
|    |        |   | C   | C   |
|    |        |   | J   | J   |
|    |        |   | C   | C   |
|    |        |   | LUC | LUC |
|    |        |   | LH  | LH  |
|    |        |   | J   | 0   |
|    |        |   | RUC | RUC |
|    |        |   | RH  | C   |
| 17 | CORNER | F | J   | J   |
|    |        |   | C   | C   |
|    |        |   | RH  | C   |
|    |        |   | LH  | LH  |
|    |        |   | LUC | LUC |
|    |        |   | RUC | RUC |
|    |        |   | J   | J   |

|  |  |  |     |     |
|--|--|--|-----|-----|
|  |  |  | C   | C   |
|  |  |  | C   | C   |
|  |  |  | LH  | LH  |
|  |  |  | RH  | C   |
|  |  |  | LUC | LH  |
|  |  |  | RUC | 0   |
|  |  |  | J   | J   |
|  |  |  | LUC | LUC |
|  |  |  | RH  | RH  |
|  |  |  | LH  | LH  |
|  |  |  | RUC | RUC |
|  |  |  | J   | J   |
|  |  |  | C   | C   |
|  |  |  | LH  | LH  |
|  |  |  | C   | C   |
|  |  |  | J   | RUC |
|  |  |  | RUC | J   |
|  |  |  | LUC | C   |
|  |  |  | RH  | LH  |
|  |  |  | J   | J   |
|  |  |  | RH  | C   |
|  |  |  | LH  | LH  |
|  |  |  | RH  | C   |
|  |  |  | LH  | J   |
|  |  |  | RUC | RUC |
|  |  |  | LUC | LUC |
|  |  |  | RUC | RUC |
|  |  |  | LUC | LUC |
|  |  |  | C   | C   |
|  |  |  | LH  | LH  |
|  |  |  | C   | C   |
|  |  |  | RUC | LUC |
|  |  |  | LUC | RUC |
|  |  |  | J   | J   |
|  |  |  | RH  | C   |
|  |  |  | RUC | RUC |
|  |  |  | LH  | LH  |
|  |  |  | RH  | C   |
|  |  |  | RUC | RUC |
|  |  |  | C   | C   |
|  |  |  | J   | J   |
|  |  |  | C   | C   |

|    |       |   |     |     |
|----|-------|---|-----|-----|
|    |       |   | LUC | LUC |
|    |       |   | LH  | LH  |
|    |       |   | J   | J   |
|    |       |   | RUC | RUC |
|    |       |   | RH  | C   |
| 18 | HYKSO | A | J   | J   |
|    |       |   | C   | C   |
|    |       |   | RH  | RH  |
|    |       |   | LH  | J   |
|    |       |   | LUC | LUC |
|    |       |   | RUC | RUC |
|    |       |   | J   | J   |
|    |       |   | C   | C   |
|    |       |   | C   | C   |
|    |       |   | LH  | J   |
|    |       |   | RH  | RH  |
|    |       |   | LUC | LH  |
|    |       |   | RUC | RUC |
|    |       |   | J   | J   |
|    |       |   | LUC | J   |
|    |       |   | RH  | RH  |
|    |       |   | LH  | LH  |
|    |       |   | RUC | C   |
|    |       |   | J   | J   |
|    |       |   | C   | C   |
|    |       |   | LH  | J   |
|    |       |   | C   | C   |
|    |       |   | J   | J   |
|    |       |   | RH  | RH  |
|    |       |   | LUC | J   |
|    |       |   | RH  | RH  |
|    |       |   | J   | J   |
|    |       |   | RH  | RH  |
|    |       |   | LH  | J   |
|    |       |   | RH  | RUC |
|    |       |   | LH  | LH  |
|    |       |   | RUC | RUC |
|    |       |   | LUC | LH  |
|    |       |   | RUC | RUC |
|    |       |   | LUC | LH  |
|    |       |   | C   | RH  |
|    |       |   | LH  | LH  |

|    |        |   |     |     |
|----|--------|---|-----|-----|
|    |        |   | C   | C   |
|    |        |   | RUC | C   |
|    |        |   | LUC | LUC |
|    |        |   | J   | J   |
|    |        |   | RH  | RH  |
|    |        |   | RUC | RUC |
|    |        |   | LH  | LUC |
|    |        |   | LH  | LH  |
|    |        |   | RUC | RUC |
|    |        |   | C   | C   |
|    |        |   | J   | J   |
|    |        |   | C   | C   |
|    |        |   | LUC | LUC |
|    |        |   | RH  | RH  |
|    |        |   | J   | J   |
|    |        |   | RUC | RUC |
|    |        |   | RH  | RH  |
| 18 | CORNER | A | J   | J   |
|    |        |   | C   | C   |
|    |        |   | RH  | RH  |
|    |        |   | LH  | J   |
|    |        |   | LUC | J   |
|    |        |   | RUC | RUC |
|    |        |   | J   | J   |
|    |        |   | C   | C   |
|    |        |   | C   | C   |
|    |        |   | LH  | J   |
|    |        |   | RH  | RUC |
|    |        |   | LUC | J   |
|    |        |   | RUC | C   |
|    |        |   | J   | J   |
|    |        |   | LUC | J   |
|    |        |   | RH  | RUC |
|    |        |   | LH  | J   |
|    |        |   | RUC | C   |
|    |        |   | J   | 0   |
|    |        |   | C   | C   |
|    |        |   | LH  | J   |
|    |        |   | C   | C   |
|    |        |   | J   | J   |
|    |        |   | RUC | C   |
|    |        |   | LUC | J   |

|    |       |   |     |     |
|----|-------|---|-----|-----|
|    |       |   | RH  | RUC |
|    |       |   | J   | J   |
|    |       |   | RH  | C   |
|    |       |   | LH  | LUC |
|    |       |   | RH  | RUC |
|    |       |   | LH  | J   |
|    |       |   | RUC | C   |
|    |       |   | LUC | J   |
|    |       |   | RUC | C   |
|    |       |   | LUC | J   |
|    |       |   | C   | C   |
|    |       |   | LH  | J   |
|    |       |   | C   | C   |
|    |       |   | RUC | RUC |
|    |       |   | LUC | J   |
|    |       |   | J   | J   |
|    |       |   | RH  | RH  |
|    |       |   | RUC | C   |
|    |       |   | LH  | LUC |
|    |       |   | RH  | RUC |
|    |       |   | RUC | C   |
|    |       |   | C   | C   |
|    |       |   | J   | J   |
|    |       |   | C   | C   |
|    |       |   | LUC | J   |
|    |       |   | LH  | J   |
|    |       |   | J   | J   |
|    |       |   | RUC | RUC |
|    |       |   | RH  | RUC |
| 19 | HYKSO | F | J   | J   |
|    |       |   | C   | C   |
|    |       |   | RH  | C   |
|    |       |   | LH  | 0   |
|    |       |   | LUC | LUC |
|    |       |   | RUC | C   |
|    |       |   | J   | J   |
|    |       |   | C   | C   |
|    |       |   | C   | 0   |
|    |       |   | LH  | LH  |
|    |       |   | RH  | C   |
|    |       |   | LUC | LH  |
|    |       |   | RUC | RH  |

|    |        |   |     |     |
|----|--------|---|-----|-----|
|    |        |   | J   | J   |
|    |        |   | LH  | J   |
|    |        |   | RH  | C   |
|    |        |   | LH  | J   |
|    |        |   | RUC | RUC |
|    |        |   | J   | J   |
|    |        |   | C   | C   |
|    |        |   | LH  | J   |
|    |        |   | C   | RH  |
|    |        |   | J   | J   |
|    |        |   | RUC | C   |
|    |        |   | LUC | LH  |
|    |        |   | RH  | RUC |
|    |        |   | J   | J   |
|    |        |   | RH  | C   |
|    |        |   | LH  | LUC |
|    |        |   | RH  | C   |
|    |        |   | LH  | J   |
|    |        |   | RUC | RH  |
|    |        |   | LUC | LH  |
|    |        |   | RUC | RH  |
|    |        |   | LUC | LH  |
|    |        |   | C   | C   |
|    |        |   | LH  | J   |
|    |        |   | C   | C   |
|    |        |   | RUC | RH  |
|    |        |   | LUC | LH  |
|    |        |   | J   | J   |
|    |        |   | LH  | C   |
|    |        |   | RUC | RH  |
|    |        |   | LH  | LH  |
|    |        |   | RH  | C   |
|    |        |   | LUC | LH  |
|    |        |   | C   | C   |
|    |        |   | J   | J   |
|    |        |   | C   | C   |
|    |        |   | LH  | J   |
|    |        |   | LUC | LH  |
|    |        |   | J   | J   |
|    |        |   | RUC | C   |
|    |        |   | RH  | C   |
| 19 | CORNER | F | J   | LH  |

|  |  |  |     |     |
|--|--|--|-----|-----|
|  |  |  | C   | C   |
|  |  |  | 0   | J   |
|  |  |  | RH  | C   |
|  |  |  | LH  | J   |
|  |  |  | LUC | LUC |
|  |  |  | RUC | RUC |
|  |  |  | J   | LH  |
|  |  |  | C   | C   |
|  |  |  | C   | C   |
|  |  |  | LH  | LH  |
|  |  |  | RH  | RH  |
|  |  |  | LUC | LUC |
|  |  |  | RUC | RUC |
|  |  |  | J   | LH  |
|  |  |  | LUC | LUC |
|  |  |  | RH  | RH  |
|  |  |  | LH  | J   |
|  |  |  | RUC | RUC |
|  |  |  | J   | LH  |
|  |  |  | C   | C   |
|  |  |  | LH  | J   |
|  |  |  | 0   | J   |
|  |  |  | C   | C   |
|  |  |  | J   | LUC |
|  |  |  | RUC | RUC |
|  |  |  | LUC | LUC |
|  |  |  | RH  | RUC |
|  |  |  | J   | LH  |
|  |  |  | RH  | RH  |
|  |  |  | LH  | LH  |
|  |  |  | RH  | C   |
|  |  |  | LH  | J   |
|  |  |  | RUC | C   |
|  |  |  | LUC | LH  |
|  |  |  | RUC | C   |
|  |  |  | LUC | LH  |
|  |  |  | C   | C   |
|  |  |  | LH  | J   |
|  |  |  | C   | C   |
|  |  |  | RUC | C   |
|  |  |  | LUC | LUC |
|  |  |  | J   | LH  |



|    |       |   |     |     |
|----|-------|---|-----|-----|
|    |       |   | RH  | C   |
|    |       |   | RUC | RUC |
|    |       |   | LH  | LH  |
|    |       |   | RH  | RH  |
|    |       |   | 0   | J   |
|    |       |   | RUC | RUC |
|    |       |   | 0   | J   |
|    |       |   | C   | C   |
|    |       |   | J   | LUC |
|    |       |   | 0   | J   |
|    |       |   | C   | C   |
|    |       |   | LUC | LUC |
|    |       |   | LH  | J   |
|    |       |   | J   | LH  |
|    |       |   | RUC | C   |
|    |       |   | RH  | RH  |
| 20 | HYKSO | F | J   | J   |
|    |       |   | C   | C   |
|    |       |   | RH  | RH  |
|    |       |   | LH  | LH  |
|    |       |   | LUC | LUC |
|    |       |   | RUC | RUC |
|    |       |   | J   | J   |
|    |       |   | C   | C   |
|    |       |   | C   | C   |
|    |       |   | LH  | LH  |
|    |       |   | RH  | RH  |
|    |       |   | LUC | LUC |
|    |       |   | RUC | RUC |
|    |       |   | J   | J   |
|    |       |   | LUC | LUC |
|    |       |   | RH  | RH  |
|    |       |   | LH  | LH  |
|    |       |   | RUC | RUC |
|    |       |   | J   | J   |
|    |       |   | C   | C   |
|    |       |   | LH  | LUC |
|    |       |   | C   | C   |
|    |       |   | J   | J   |
|    |       |   | RUC | RUC |
|    |       |   | LUC | LUC |
|    |       |   | RH  | RH  |

|    |        |   |     |     |
|----|--------|---|-----|-----|
|    |        |   | J   | J   |
|    |        |   | RH  | RH  |
|    |        |   | LH  | LH  |
|    |        |   | RH  | RH  |
|    |        |   | LH  | LH  |
|    |        |   | RUC | RUC |
|    |        |   | LUC | LH  |
|    |        |   | RUC | RUC |
|    |        |   | LUC | LUC |
|    |        |   | C   | C   |
|    |        |   | LH  | LH  |
|    |        |   | C   | C   |
|    |        |   | RUC | RUC |
|    |        |   | LUC | LH  |
|    |        |   | J   | J   |
|    |        |   | RH  | RH  |
|    |        |   | RUC | RUC |
|    |        |   | LH  | LH  |
|    |        |   | RH  | RUC |
|    |        |   | LUC | LUC |
|    |        |   | C   | C   |
|    |        |   | J   | J   |
|    |        |   | C   | C   |
|    |        |   | LUC | LUC |
|    |        |   | LH  | LH  |
|    |        |   | J   | J   |
|    |        |   | RUC | RUC |
|    |        |   | RH  | RH  |
| 20 | CORNER | F | J   | J   |
|    |        |   | C   | C   |
|    |        |   | RH  | C   |
|    |        |   | LH  | LH  |
|    |        |   | LUC | LUC |
|    |        |   | RUC | RUC |
|    |        |   | J   | J   |
|    |        |   | C   | C   |
|    |        |   | C   | C   |
|    |        |   | LH  | LUC |
|    |        |   | RH  | C   |
|    |        |   | LUC | LUC |
|    |        |   | RUC | RUC |
|    |        |   | J   | J   |

|    |       |   |     |     |
|----|-------|---|-----|-----|
|    |       |   | LUC | LUC |
|    |       |   | RH  | RUC |
|    |       |   | LH  | LH  |
|    |       |   | RUC | RUC |
|    |       |   | J   | C   |
|    |       |   | C   | J   |
|    |       |   | LH  | LH  |
|    |       |   | C   | C   |
|    |       |   | J   | RUC |
|    |       |   | RUC | J   |
|    |       |   | LUC | LUC |
|    |       |   | RH  | RUC |
|    |       |   | J   | J   |
|    |       |   | RH  | RH  |
|    |       |   | LH  | LH  |
|    |       |   | RH  | C   |
|    |       |   | LH  | LH  |
|    |       |   | RUC | RUC |
|    |       |   | LH  | LH  |
|    |       |   | RUC | RUC |
|    |       |   | LUC | LUC |
|    |       |   | C   | C   |
|    |       |   | LH  | LH  |
|    |       |   | C   | C   |
|    |       |   | RUC | RUC |
|    |       |   | LUC | LUC |
|    |       |   | J   | J   |
|    |       |   | RH  | C   |
|    |       |   | RUC | RUC |
|    |       |   | LH  | LH  |
|    |       |   | RH  | RUC |
|    |       |   | RUC | RUC |
|    |       |   | C   | C   |
|    |       |   | J   | J   |
|    |       |   | C   | C   |
|    |       |   | LUC | LUC |
|    |       |   | LH  | LH  |
|    |       |   | J   | J   |
|    |       |   | RUC | RUC |
|    |       |   | RH  | RH  |
| 21 | HYKSO | F | J   | J   |
|    |       |   | C   | C   |

|  |  |  |     |     |
|--|--|--|-----|-----|
|  |  |  | RH  | RH  |
|  |  |  | LH  | J   |
|  |  |  | LUC | LUC |
|  |  |  | RUC | RUC |
|  |  |  | J   | J   |
|  |  |  | C   | C   |
|  |  |  | C   | C   |
|  |  |  | LH  | 0   |
|  |  |  | RH  | RH  |
|  |  |  | LUC | 0   |
|  |  |  | RUC | RUC |
|  |  |  | J   | J   |
|  |  |  | LUC | LUC |
|  |  |  | RH  | 0   |
|  |  |  | LH  | LH  |
|  |  |  | RUC | RUC |
|  |  |  | J   | J   |
|  |  |  | C   | C   |
|  |  |  | LH  | LH  |
|  |  |  | C   | C   |
|  |  |  | J   | J   |
|  |  |  | 0   | 0   |
|  |  |  | LUC | LUC |
|  |  |  | RH  | RH  |
|  |  |  | J   | J   |
|  |  |  | RH  | RH  |
|  |  |  | LH  | LH  |
|  |  |  | RH  | 0   |
|  |  |  | LH  | LH  |
|  |  |  | RUC | RUC |
|  |  |  | LH  | 0   |
|  |  |  | RUC | RUC |
|  |  |  | LUC | J   |
|  |  |  | C   | C   |
|  |  |  | LH  | LH  |
|  |  |  | C   | C   |
|  |  |  | RUC | RUC |
|  |  |  | LUC | LH  |
|  |  |  | J   | J   |
|  |  |  | RH  | RH  |
|  |  |  | RUC | RUC |
|  |  |  | LH  | LH  |

|    |        |   |     |     |
|----|--------|---|-----|-----|
|    |        |   | RH  | RH  |
|    |        |   | RUC | RUC |
|    |        |   | J   | J   |
|    |        |   | C   | C   |
|    |        |   | C   | C   |
|    |        |   | LUC | LUC |
|    |        |   | LH  | J   |
|    |        |   | J   | J   |
|    |        |   | RUC | RUC |
|    |        |   | RH  | C   |
| 21 | CORNER | F | J   | J   |
|    |        |   | C   | C   |
|    |        |   | RH  | RH  |
|    |        |   | LH  | LH  |
|    |        |   | LUC | LUC |
|    |        |   | RUC | RUC |
|    |        |   | J   | 0   |
|    |        |   | C   | C   |
|    |        |   | C   | C   |
|    |        |   | 0   | 0   |
|    |        |   | RH  | RH  |
|    |        |   | LUC | LUC |
|    |        |   | RH  | RH  |
|    |        |   | J   | J   |
|    |        |   | LUC | LUC |
|    |        |   | RH  | RH  |
|    |        |   | LH  | LH  |
|    |        |   | RUC | RUC |
|    |        |   | J   | J   |
|    |        |   | C   | C   |
|    |        |   | LH  | LH  |
|    |        |   | C   | C   |
|    |        |   | J   | J   |
|    |        |   | RUC | RUC |
|    |        |   | LUC | LUC |
|    |        |   | RH  | RH  |
|    |        |   | J   | 0   |
|    |        |   | RH  | RH  |
|    |        |   | LH  | LH  |
|    |        |   | RH  | RH  |
|    |        |   | LH  | LH  |
|    |        |   | RUC | RUC |

|  |  |  |     |     |
|--|--|--|-----|-----|
|  |  |  | LUC | LH  |
|  |  |  | RUC | RUC |
|  |  |  | LUC | LUC |
|  |  |  | C   | C   |
|  |  |  | LH  | LH  |
|  |  |  | C   | C   |
|  |  |  | RUC | RUC |
|  |  |  | LUC | LUC |
|  |  |  | J   | J   |
|  |  |  | RH  | RH  |
|  |  |  | RUC | RUC |
|  |  |  | LH  | LH  |
|  |  |  | RH  | RH  |
|  |  |  | RUC | RUC |
|  |  |  | J   | J   |
|  |  |  | C   | C   |
|  |  |  | C   | C   |
|  |  |  | LUC | LUC |
|  |  |  | LH  | LH  |
|  |  |  | J   | J   |
|  |  |  | RUC | RUC |
|  |  |  | RH  | RH  |
